# Supplementary material for: Distribution of Capsular Types of Campylobacter jejuni Isolates from Symptomatic and Asymptomatic Children in Peru
Source: PubMed Central journal article supplement (PMC6726929; doi:10.4269/ajtmh.18-0994), 2019-08-05
Supplement: tpmd180994.SD1.pdf [file tpmd180994.SD1.pdf]

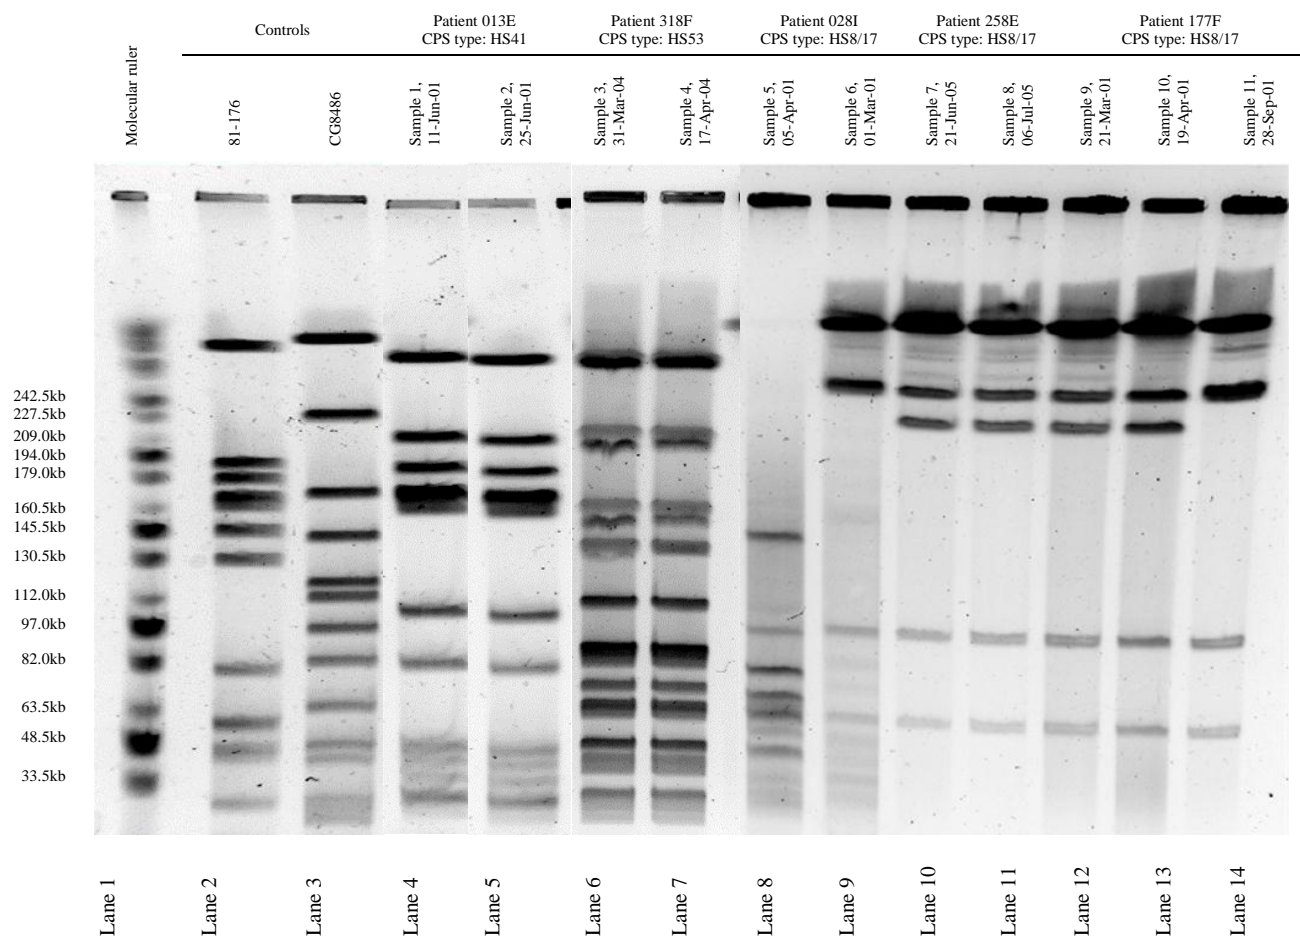

1

2 Figure S1. Illustration of PFGE gel.
